1 Spatial replication should be prioritized to advance our understanding of  
2 population responses to climate

3 Aldo Compagnoni<sup>1,2,3</sup>, Sanne Evers<sup>1,2,3</sup>, Tiffany Knight<sup>1,2,3</sup>

4

5 Running head: spatial replicates estimate climate effects

6

7 <sup>1</sup> Martin Luther University Halle-Wittenberg, Am Kirchtor 1, 06108, Halle (Saale), Germany.

8 <sup>2</sup> Department of Community Ecology, Helmholtz Centre for Environmental Research–UFZ, 06120 Halle (Saale),  
9 Germany.

10 <sup>3</sup> German Centre for Integrative Biodiversity Research (iDiv) Halle-Jena-Leipzig, Puschstrasse 4, Leipzig 04103,  
11 Germany.

12 **Abstract**

13 Understanding the responses of plant populations dynamics to climatic variability is frustrated by  
14 the need for long-term datasets that capture demographic responses to a range of climates. Here,  
15 we advocate for new studies that prioritize spatial over temporal replication, but without inferring  
16 the effect of temporal climatic gradients from spatial climatic gradients – as usually done in the so  
17 called “space-for-time substitutions”. Rather, we advocate to estimate the effects of climate by  
18 sampling replicate populations in locations with similar climate. We first use data analysis on spatial  
19 locations in the conterminous USA to assess how far apart spatial replicates should be from each  
20 other to minimize temporal correlations in climate. We find that spatial locations separated by 250  
21 Km have moderate (0.5) correlations in annual precipitation. Second, we use simulations to  
22 demonstrate that spatial replication can lead to substantial gains in the range of climates sampled  
23 during a given set of years so long as the climate correlations between the populations are at low to  
24 moderate levels. Third, we use simulations to quantify how many spatial replicates would be  
25 necessary to achieve the same statistical power of a single-population, long-term data set under  
26 different strengths and directions of spatial correlations in climate between spatial replicates. Our  
27 results indicate that spatial replication is an untapped opportunity to study the effects of climate on  
28 demography and to rapidly fill important knowledge gaps in the field of population ecology.

29

30 **Keywords:** climate vulnerability assessment, power analysis, sampling design, sample size, forecast,  
31 population growth rate, demography, Space-for-Time substitution.

## 32 INTRODUCTION

33 Understanding the responses of biodiversity to climate drivers is necessary to mitigate and adapt to  
34 climate change (Urban et al., 2016). In recent years, there are several examples of successful and  
35 directly applicable forecasts that predict the effects of climatic drivers on ecological variables  
36 (Grevstad et al., 2022; Harris et al., 2018; Hartman et al., 2020). There has been slower progress in  
37 predicting the effects of climate on populations and their demography, which is necessary to assess  
38 species extinction risk (Mace et al., 2008) and predict range shifts (Schurr et al., 2012). Previous  
39 studies suggest that it takes 20-25 years of data to sufficiently describe the relationship between  
40 climate and demography (Teller et al., 2016; Tenhumberg et al., 2018). This large replication is  
41 necessary to sample a wider range of climatically extreme years (Tenhumberg et al. 2018) and to  
42 increase statistical power in the presence of noise caused by non-climate factors (e.g., variation in  
43 biotic and abiotic conditions).

44 Beyond improving our forecasting skill, we have important knowledge gaps in population  
45 ecology that must be filled, and we cannot wait 20-25 years to acquire missing information about  
46 understudied species and regions. For example, our recent synthesis brought to our attention that  
47 knowledge on climate-demography relationships for plants is particularly poor for the species-rich  
48 tropics, and for species with extreme generation times (Compagnoni et al., 2021). We need  
49 immediate research targeting these locations and plant life histories. As the vast majority of plant  
50 ecologists are at young career stages, we need to engage Doctoral Researchers and Postdoctoral  
51 Associates in this field of research. However, this will not happen if we require projects to have a  
52 duration of two decades.

53 It is our opinion that new studies should prioritize spatial over temporal replication to assess  
54 the demographic responses of a species to climate. Having both spatial and temporal data allows  
55 collecting a high sample size in a relatively short period of time. Spatial sampling increases our  
56 statistical power because it increases the range of climates that can be sampled across a short

57 period of time, allowing us to “see through the noise” caused by non-climatic factors. The range of  
58 climates sampled can be maximized by censusing populations far enough that the correlation of  
59 yearly climatic anomalies among them is low.

60 Here, we are not advocating a “space-for-time substitution”, but simply to prioritize spatial  
61 versus temporal replication. Space-for-time substitution studies use spatial gradients that differ  
62 dramatically in climate to infer temporal links between climate and population dynamics (Blois et al.,  
63 2013). Here, we are instead advocating to replicate sampling across populations that occur in similar  
64 climates, and to use this spatial data as a *replicate* of the same temporal process. This  
65 recommendation relies on the assumption that in similar environments, plant populations should  
66 respond similarly to climate anomalies. For example, the effect of hot or cold years on the growth  
67 rate of populations all located at the upper elevational limit of a species’ range should be similar in  
68 sign and magnitude (Kleinhesselink & Adler, 2018; Morley et al., 2017). There are already many  
69 studies that sample populations across species’ ranges in order to capture different climates (e.g.  
70 Doak & Morris, 2010; Kleinhesselink & Adler, 2018; Merow et al., 2014; Sheth & Angert, 2018).  
71 However, to our knowledge, no plant population study has yet prioritized spatial replication across  
72 sites with similar climatic conditions to study climate-demography relationships.

73 In this manuscript, we examine in detail the opportunities provided by spatial replication  
74 when studying climate-demography relationship through data analysis and simulation. First, we  
75 assess how far apart populations must be from each other to attenuate temporal correlations in  
76 climate, by quantifying the relationship between the distance between spatial locations and their  
77 correlation in annual precipitation and temperature. We do this using gridded climatic data from the  
78 conterminous USA. Second, we consider how sampling design can maximize the range of climates  
79 captured during a study by estimating how the range of climates sampled changes depending on the  
80 climate correlations between the populations (i.e., which is based on the distance between  
81 populations) and the study duration (between five and 30 years). Third, we use simulation to

82 quantify the statistical power of a climate-demography relationship across sampling designs that  
83 vary in the number of spatial and temporal replicates, and the strength and direction of spatial  
84 correlations in climate between populations. In this simulation, we also address cases in which  
85 populations respond differently to climate, or have different degrees of temporal demographic  
86 variability. Based on these results, we make recommendations for new demographic research.

87     **METHODS**

88     *Spatial correlation in climate*

89     To understand how spatial correlation in climates depends on the distance between sites, we  
90     estimate the spatial correlation of annual climate in the conterminous USA, a large and climatically  
91     heterogeneous region of the world. We downloaded monthly temperature and precipitation data  
92     for the conterminous United States from the CHELSA database (Karger et al., 2017, 2018). We used  
93     CHELSA data, because it is accurate on varied topographic terrain. Such gridded data also provides  
94     systematic spatial coverage, and when used for annual means, it correlates strongly with weather  
95     station data (Behnke et al., 2016). We downloaded data following a regular grid of 0.5 degrees, for a  
96     total of 3253 locations, from 35 years, between 1979 and 2013. For each point along this grid, we  
97     calculated annual temperature means, annual precipitation sums, and computed their standardized  
98     yearly anomalies (z-scores, henceforth “anomalies”). We analyzed the decay of correlation between  
99     these temperature and precipitation anomalies using five reference locations. We picked these  
100    locations subjectively, attempting to choose the most distant points in the conterminous United  
101    States. These locations were in the Southwestern coast, Northwestern coast, Northeast Coast,  
102    Southeast coast, and in the center of the United States.

103           For each of these five reference locations, we calculated the correlation between its 35  
104    annual temperature and precipitation anomalies, and the same anomalies observed at the other  
105    3252 locations. We plotted the correlation between climatic anomalies versus the distance from the  
106    reference location. We produced heatmaps showing the correlation of the climatic anomalies with  
107    the reference locations.

108

109    *Range of climates sampled with different sampling designs*

110 We performed simulations to understand how the range of climate anomalies sampled changes as  
111 temporal replication increases when sampling one site, or multiple sites with different spatial  
112 correlation in climatic anomalies. We estimated the range of climatic anomalies sampled at a single  
113 site using a normal distribution:

$$114 \quad \mathbf{X} \sim \text{Normal}(0,1), \quad (1a)$$

$$115 \quad \text{Range}_x = \frac{\text{Max}(X) - \text{Min}(X)}{2}, \quad (1b)$$

116 where  $\mathbf{X}$  is a vector of climate anomalies at the site. The length of  $\mathbf{X}$  is  $n$ , which is the temporal  
117 replication of the study. The standard deviation in Eq. 1a is one, reflecting that we are simulating a  
118 series of anomalies. To obtain  $\text{Range}_x$ , the expected range of  $\mathbf{X}$  values (Eq. 1b), we simulated Eq. 1a  
119 1000 times across  $n$  values ranging from two to 30 in increments of one. We calculated the mean of  
120  $\text{Range}_x$  across these 1000 replicate simulations.

121 We estimated the range of climatic anomalies sampled at two sites drawing values from a  
122 multivariate normal distribution,

$$123 \quad \mathbf{X} \sim \text{MVN}(\mathbf{0}, \begin{bmatrix} 1 & \rho \\ \rho & 1 \end{bmatrix}), \quad (2)$$

124 where  $\mathbf{X}$  is an  $n$  by 2 matrix, MVN indicates the values in  $\mathbf{X}$  follow a multivariate normal distribution,  
125 and  $\rho$  is the correlation between the climatic anomalies of two sites. We simulated  $\mathbf{X}$  1000 times  
126 across a series of  $\rho$  values of 0, 0.5, 0.95, and one. We simulated  $n$  values that went from two to 30  
127 in increments of one.

128

### 129 *Statistical power for climate-demography relationship with different sampling designs*

130 We used simulations to quantify the statistical power of the relationship between climate and  
131 population growth rate for different spatio-temporal sampling designs and different spatial

132 correlations in climate. First, we simulated the linear relationship between log population growth  
133 rates and a normally distributed climatic anomaly at one site using:

$$134 \quad \mathbf{X} \sim \text{Normal}(0,1), \quad (3a)$$

$$135 \quad \hat{Y}_i = \beta_0 + \beta_1 X_i, \quad (3b)$$

$$136 \quad Y_i \sim \text{Normal}(\hat{Y}_i, \varepsilon), \quad (3a)$$

137 where  $\mathbf{X}$  is a vector of size  $n$  of normally distributed climatic anomalies,  $\hat{Y}_i$  is the average prediction of  
138 the model,  $\beta_0$  the intercept of the linear model,  $\beta_1$  is the slope, and  $Y_i$  represents the natural  
139 logarithm of a population growth rate at year  $i$ . We used a log population growth rate because we  
140 have synthetic estimates of climatic effects on this variable (Compagnoni et al., 2021), because this  
141 variable is the central focus of demographic theory (Caswell, 2001; Lewontin & Cohen, 1969; Sibly &  
142 Hone, 2002), and because log population growth rate is normally distributed, facilitating simulations  
143 and their interpretation by the reader. We simulated the process in Eq. 3 1000 times, assuming  
144 study durations,  $n$ , of 20, and 30 years. For this and subsequent simulations we used a  $\beta_1$  value of  
145 0.05, and a  $\varepsilon$  value of 0.15. Our choice of  $\beta_1$  reflects the effect size of precipitation anomalies on log  
146 population growth rate that we estimated across 162 plant populations (Compagnoni et al., 2021).  
147 The choice of our  $\varepsilon$  reflects the median standard deviation of the log population growth rate  
148 estimated on the same 162 populations.

149 Then, we expanded this model to accommodate spatial replicates whose climatic anomalies  
150 were correlated to different degrees. To do so, the simulated process was

$$151 \quad \mathbf{X} \sim \text{MVN}(\mathbf{0}, \begin{bmatrix} 1 & \rho \\ \rho & 1 \end{bmatrix}), \quad (4a)$$

$$152 \quad \hat{Y}_{ip} = \beta_0 + \beta_1 X_{ip}, \quad (4b)$$

$$153 \quad Y_{ip} \sim \text{Normal}(\hat{Y}_{ip}, \varepsilon), \quad (4c)$$



154 where  $\rho$  is the correlation between the climatic anomalies of two sites, and subscript  $p$  refers to each  
155 site. We simulated the process described in Eq. 4 1000 times using study durations,  $n$ , of three and  
156 five years, correlations  $\rho$  of 0.95 and 0.5, 0, and -0.5 and a number of spatial replicates of two, 10,  
157 20, 30, 40, and 50. When the number of spatial replicates exceeded two, we divided the populations  
158 in two subsets, and assigned each subset to one of the two series of climatic anomalies simulated by  
159 Eq. 4a. For example, when spatial replicates were 50, we subdivided these replicates in two groups  
160 of 25 replicates. Note that replicates within each group experienced identical climate. We used low  
161 values for  $n$  to reflect that the median length of demographic studies of plants is four years  
162 (Salguero-Gómez et al., 2015). This sampling effort likely reflects the length of many PhD programs.  
163 We calculated power as the proportion of the 1000 simulations for which  $\beta_1$  had a p-value below  
164 0.05. We performed a power analysis not because we expect investigators to perform null  
165 hypothesis tests relying on p-values. Rather, our power analysis is a simple, intuitive way to quantify  
166 how the uncertainty of model estimates is influenced by the sampling design.

167 The power estimate described above assumed that  $\beta_1$ , in Eq. 3-4b, were the same for each  
168 population. We have limited information to evaluate whether there is variation across populations in  
169  $\beta_1$ . A few studies report changes in  $\beta_1$  values across populations, but many of these studies sampled  
170 populations with different average climates (Iler et al., 2019; Sletvold et al., 2013; Tye et al., 2018).  
171 Nevertheless, as it is possible for  $\beta_1$  to vary spatially, we address the sensitivity of our power  
172 estimates to spatial variation in  $\beta_1$ . To do so, we modified the simulations presented in Eq. 4. We  
173 simulated a nested sampling design in which different populations are sampled in groups of three  
174 that experience identical  $\beta_1$  or  $\epsilon$  values. In these simulations, equation 4a contains  $\rho$  values equal to  
175 one. In the first sensitivity analysis, each group of three populations has a different  $\beta_1$  value, so that

176 
$$\beta_{1g} \sim \text{Normal}(\mu = 0.05, \sigma), \quad (5)$$

177 where  $\beta_{1g}$  are the effect sizes for group  $g$  of three populations, and the values suggest a mean  $\beta_{1g}$   
178 value of 0.05 with a standard deviation of  $\sigma$ . We tested three values of  $\sigma$ : 0.007, 0.0125, and 0.025.

179 Note that in the largest  $\sigma$  value, over 5% of  $\beta_{1g}$  values are expected to be lower than zero. We  
180 explored the change in statistical power introduced by Eq. 5 simulating three years of data, and a  
181 number of populations going from a minimum of three to a maximum of 48, in increments of three.

182 **RESULTS**

183 *Spatial correlation in climate*

184 Annual temperature anomalies are strongly correlated even at relatively large (e.g. 500 Km)  
185 distances. The correlation between precipitation anomalies is less strong, and it decays more rapidly  
186 with distance (Fig. 1, Fig. S1-4). However, on average the correlation does not approach zero until  
187 the distance from the reference location is at least 750 Km for precipitation (Fig. S3) and 1000 Km for  
188 temperature (Fig. S2). The distance to reach a correlation of 0.5 is approximately at least 100 Km for  
189 both precipitation (Fig. S1) and temperature (Fig. S2). Interestingly, we find that the climate of the  
190 reference point on the Southwestern US coast tended to correlate less strongly with the rest of the  
191 locations in the US (Fig. S2).

192

193 *Range of climates sampled with different sampling designs*

194 Spatial replication can lead to substantial gains into the range of climates sampled during a given set  
195 of years so long as the climate correlations between populations are at low to intermediate levels.  
196 To reach a range of  $\pm 2$  standard deviation at a single site, one would on average need 27 years of  
197 data. This number of years decreases to 20 when using two sites whose climate has correlation 0.9,  
198 and 15 when two sites have correlations 0.5 (Figure 2).

199

200 *Statistical power for climate-demography relationship with different sampling designs*

201 Our power analysis indicates that spatial replication greatly increases the power to detect a  
202 relationship between climate and population growth rate (Fig. 3). The statistical power of very long  
203 time series for a single site is comparable to that of datasets with high spatial replication. This holds  
204 even when the climate of the spatial replicates has a high correlation (e.g. correlation 0.95, Fig. 3).  
205 20 and 25 temporal replicates with one spatial replicate provides a statistical power of about 30 and

206 40%, respectively. These two statistical powers are reached by just three temporal replicates with,  
207 respectively, 10 and 20 spatial replicates experiencing highly correlated climate (0.5, 0.95). Still  
208 assuming high climatic correlations, statistical power exceeds 40% when the temporal replication  
209 increases to five years. Lower climatic correlation between populations slightly increases statistical  
210 power: going from a climatic correlation of 0.95 to zero can increase power by over 10% when  
211 temporal replicates are three (Fig. 3).

212         Assuming variation in the effect of climate on demography (represented by  $\beta_1$  values) did  
213 not noticeably affect statistical power (Fig. S5). Statistical power remained unchanged presumably  
214 because the average  $\beta_1$  is still 0.05.

215 **DISCUSSION**

216 Until recently, understanding the response of plant species to temporal climatic gradients has relied  
217 on either long-term monitoring efforts, which are extremely rare (Salguero-Gómez et al., 2015,  
218 2016), or on responses of plant populations to spatial climate gradients ("space-for-time  
219 substitutions", Blois et al., 2013), which are affected by several confounding factors (Damgaard,  
220 2019). Fortunately, our power analysis shows that we can propel our understanding of species  
221 responses to climate using spatial replicates that come from sites with similar climate (i.e., similar  
222 long-term average climates). Moreover, dividing spatial replicates by large distances (e.g. 100 Km)  
223 ensures climates are not perfectly correlated. Such imperfect correlation allows for sampling a larger  
224 range of climates sampled in a shorter timeframe, further compounding gains in statistical power.  
225 We believe this finding could foster progress in global climate change vulnerability assessments,  
226 near-term demographic forecasts, and ecological understanding in general. Based on our results, we  
227 provide suggestions on sampling designs leveraging spatial replication.

228 The golden standard for vulnerability assessments relies on population dynamics and  
229 demography (Mace et al., 2008). In order to understand which life-histories and which geographic  
230 regions will be most affected by climate change, we need more demographic studies that quantify  
231 climate-demography relationships. Our power analysis shows that three years of data from ten  
232 spatial replicates have the same statistical power as 20 years of data at a single site. The ability to  
233 obtain estimates of climate effects in such a short time will likely enable covering the taxonomic,  
234 geographic, and life-history biases present in our current data (e.g. Compagnoni et al., 2021).

235 A benefit of increased spatial replication is that it allows scientists to reach adequate  
236 inferences in as little as three years, which will facilitate ecological understanding via iterative  
237 (yearly) forecasts. Forecasts can promote ecological understanding when they are tested repeatedly  
238 across successive iterations (Dietze et al., 2018). For example, performing model selection on three  
239 years of data from 20 separate plant populations might suggest growing season precipitation is a

240 good predictor of demographic performance. A way to test this inference is to forecast the  
241 demography of these 20 populations after the third year of data collection. These forecasts provide  
242 each year with 20 out-of-sample data points to test whether growing season precipitation  
243 outperforms other predictors. Successive out-of-sample tests might end up changing initial  
244 inferences: for example, supporting predictors other than growing season precipitation (e.g. vapor  
245 pressure deficit), different model structures (e.g. including density dependence), or motivating  
246 changes in data collection efforts.

247         Spatial replicates are particularly suited to address two mechanisms that could confound  
248 climate-demography relationship: species interactions, and microsite variation. First, species  
249 interactions mediated by conspecific and heterospecific densities are known to be a key component  
250 of population and community dynamics (Chesson, 2000). As a consequence, a growing body of  
251 research emphasizes the role of the indirect effects of climate mediated through heterospecific  
252 abundances (Adler et al., 2012; Gilman et al., 2010; Suttle et al., 2007). Understanding these effects  
253 relies on estimates of conspecific and heterospecific densities which, however, are hard to perform:  
254 conspecific effects are attenuated by observation error, which leads to “regression dilution” (Detto  
255 et al., 2019; Knape & de Valpine, 2011). However, regression dilution is weaker as the range of  
256 densities increases. In the short term, variation in conspecific densities is likely to be much greater  
257 across space than time. Spatial replicates are therefore ideal to capture a wide range of conspecific  
258 and heterospecific densities. The result is that spatial replication facilitates the estimation of  
259 conspecific and heterospecific effects which can be used to project the effect of indirect climatic  
260 effects. Second, climate effects on populations should be modulated by soil conditions (Lindell et al.,  
261 2022; Nicolè et al., 2011). Reaching a general understanding on this subject could be achieved by  
262 stratifying spatial replicates by soil type, and fitting hierarchical models on the resulting data.

263         To exploit the opportunities provided by spatial replication, investigators should sample sites  
264 that can be considered as independent samples (e.g., populations not connected by dispersal).

265 However, even when sites are separated by relatively large distances, factors other than climate  
266 (e.g. outbreaks of natural enemies) could result in spatially autocorrelated vital rates. Therefore, it is  
267 prudent for investigators to plan on estimating the spatial autocorrelation among spatial replicates.  
268 A previous study suggests that to estimate spatial autocorrelation, replicates should be disposed at  
269 random through the landscape, rather than according to regular sampling designs (Fortin et al.,  
270 1989). If detected, explicit modeling of spatial autocorrelation within linear models can increase  
271 statistical power and decrease parameter uncertainty (Zuur et al., 2009).

272 In our simulations, we have ignored the possibility for spatial replicates to have unequal  
273 residual variance. We did so because unequal residual variance is both unlikely to occur, and it will  
274 not affect the average estimates of climatic effects. Unequal variance is not likely because  
275 population growth rate increases in temporal variance only at range edges (Csergő et al., 2017;  
276 Sexton et al., 2009). Therefore, if spatial replicates come from similar environmental conditions,  
277 changes in variance among spatial replicates should be small. However, even in the case residual  
278 variance is variable among spatial replicates, this issue is only relevant for probabilistic predictions of  
279 single data points (Gelman et al. 2020). When such predictions are the objective, the issue of  
280 unequal variance can be ameliorated using weighted least squares regression (Gelman et al., 2020).

281 Perhaps the most important limitation of spatial replication is for species with small ranges  
282 with few extant populations. There are many examples of species with extremely small ranges  
283 (Thorne et al., 2009), and with few (Colas et al., 2001) or just one (Jones et al., 1995) extant  
284 populations. In these cases, climate vulnerability assessments will necessarily rely have to rely on  
285 other methods to quantify climate sensitivity.

286 While our manuscript has focused on plants, the benefits of spatial replication extends also  
287 to animals with short dispersal distances. Just like in plants, the quantification of climate sensitivity  
288 in animals suffers from important geographic and taxonomic biases (Paniw et al., 2021). Moreover,  
289 while demographic research in animals tend to be more short term than for plants, spatial replicates

290 are typically one or few at most (Salguero-Gómez et al., 2016). These considerations suggest that the  
291 potential of spatial replication to aid the study of climate sensitivity in animals could be  
292 underexploited. However, spatial replication in animals would be practical only for species with  
293 relatively low dispersal ability.

294 The spatially replicated sampling we propose here is a practical solution to estimate climate-  
295 demography relationships and rapidly fill important knowledge gaps in the field of population  
296 ecology. The current dearth of long-term data almost certainly stems from the difficulty of  
297 maintaining data collection efforts under the most common funding schemes, which typically last  
298 three to seven years. In the time frame relevant to working on a PhD thesis, it might be possible to  
299 observe 20 populations across three years, and achieve the same power for estimating climate-  
300 demography relationships that was thought to only be possible with decades-long sampling.  
301 Monitoring 20 or more populations simultaneously is a large task for a single researcher. However,  
302 such spatial replication might become more feasible with modern methods and through  
303 collaborative research networks. For example, the demography of some populations can be sampled  
304 effectively with small unmanned aerial vehicles (e.g. Bogdan et al., 2021). Moreover, observation  
305 networks for demographic data already exist: for example, PlantPopNet collects data from 46  
306 populations of *Plantago lanceolata* around the world (Villemas et al., 2021). We believe that the  
307 sampling choices we advocate in this article will contribute to the maturation of population ecology  
308 and its links to conservation science, functional ecology, and macro-ecology.

309

### 310 **Acknowledgements**

311 AC, SE, and TMK were supported by the Alexander von Humboldt Foundation under the framework  
312 of the Humboldt Professorship, and by the Helmholtz Recruitment Initiative of the Helmholtz  
313 Association (both to TMK). This work was inspired during the sAPROPOS (Analysis of PROjections of  
314 POpulationS) working group led by Roberto Salguero-Gómez and TMK at the German Centre for



315 Integrative Biodiveristy Research (iDiv), which is funded by the German Research Foundation (FZT-  
316 118-202548816).

317

318 **Data Sharing and Data Accessibility.** The climatic data used in this article is the CHELSA dataset  
319 version 1.2, which is available at <http://dx.doi.org/doi:10.5061/dryad.kd1d4>.

320 **REFERENCES**

321

322 Adler, P. B., Dalglish, H. J., & Ellner, S. P. (2012). Forecasting plant community impacts of climate  
323 variability and change: When do competitive interactions matter? *Journal of Ecology*, *100*,  
324 478–487.

325 Behnke, R., Vavrus, S., Allstadt, A., Albright, T., Thogmartin, W. E., & Radeloff, V. C. (2016).

326 Evaluation of downscaled, gridded climate data for the conterminous United States.

327 *Ecological Applications*, *26*(5), 1338–1351. <https://doi.org/10.1002/15-1061>

328 Blois, J. L., Williams, J. W., Fitzpatrick, M. C., Jackson, S. T., & Ferrier, S. (2013). Space can substitute

329 for time in predicting climate-change effects on biodiversity. *Proceedings of the National*

330 *Academy of Sciences*, *110*(23), 9374–9379. <https://doi.org/10.1073/pnas.1220228110>

331 Bogdan, A., Levin, S. C., Salguero-Gómez, R., & Knight, T. M. (2021). Demographic analysis of an

332 Israeli *Carpobrotus* population. *PLOS ONE*, *16*(4), e0250879.

333 <https://doi.org/10.1371/journal.pone.0250879>

334 Caswell, H. (2001). *Matrix Population Models: Construction, Analysis and Interpretation*. Sinauer

335 Associates, Inc.

336 Chesson, P. (2000). Mechanisms of maintenance of species diversity. *Annual Review of Ecology and*

337 *Systematics*, 343–366.

338 Colas, B., Olivieri, I., & Riba, M. (2001). Spatio-temporal variation of reproductive success and

339 conservation of the narrow-endemic *Centaurea corymbosa* (Asteraceae). *Biological*

340 *Conservation*, *99*(3), 375–386. [https://doi.org/10.1016/S0006-3207\(00\)00229-9](https://doi.org/10.1016/S0006-3207(00)00229-9)

341 Compagnoni, A., Levin, S., Childs, D. Z., Harpole, S., Paniw, M., Römer, G., Burns, J. H., Che-Castaldo,

342 J., Rüger, N., Kunstler, G., Bennett, J. M., Archer, C. R., Jones, O. R., Salguero-Gómez, R., &

343 Knight, T. M. (2021). Herbaceous perennial plants with short generation time have stronger

344 responses to climate anomalies than those with longer generation time. *Nature*

345 *Communications*, *12*(1), 1824. <https://doi.org/10.1038/s41467-021-21977-9>

- 346 Csergő, A. M., Salguero-Gómez, R., Broennimann, O., Cou tts, S. R., Guisan, A., Angert, A. L., Welk, E.,  
347 Stott, I., Enquist, B. J., McGill, B., Svenning, J.-C., Violle, C., & Buckley, Y. M. (2017). Less  
348 favourable climates constrain demographic strategies in plants. *Ecology Letters*, *20*(8), 969–  
349 980. <https://doi.org/10.1111/ele.12794>
- 350 Damgaard, C. (2019). A Critique of the Space-for-Time Substitution Practice in Community Ecology.  
351 *Trends in Ecology & Evolution*, *34*(5), 416–421. <https://doi.org/10.1016/j.tree.2019.01.013>
- 352 Detto, M., Visser, M. D., Wright, S. J., & Pacala, S. W. (2019). Bias in the detection of negative density  
353 dependence in plant communities. *Ecology Letters*, *22*(11), 1923–1939.  
354 <https://doi.org/10.1111/ele.13372>
- 355 Dietze, M. C., Fox, A., Beck-Johnson, L. M., Betancourt, J. L., Hooten, M. B., Jarnevich, C. S., Keitt, T.  
356 H., Kenney, M. A., Laney, C. M., Larsen, L. G., Loescher, H. W., Lurch, C. K., Pijanowski, B. C.,  
357 Randerson, J. T., Read, E. K., Tredennick, A. T., Vargas, R., Weathers, K. C., & White, E. P.  
358 (2018). Iterative near-term ecological forecasting: Needs, opportunities, and challenges.  
359 *Proceedings of the National Academy of Sciences*, *115*(7), 1424–1432.  
360 <https://doi.org/10.1073/pnas.1710231115>
- 361 Doak, D. F., & Morris, W. F. (2010). Demographic compensation and tipping points in climate-  
362 induced range shifts. *Nature*, *467*(7318), 959–962. <https://doi.org/10.1038/nature09439>
- 363 Fortin, M.-J., Drapeau, P., & Legendre, P. (1989). Spatial Autocorrelation and Sampling Design in  
364 Plant Ecology. *Vegetatio*, *83*(1/2), 209–222.
- 365 Gelman, A., Hill, J., & Vehtari, A. (2020). *Regression and Other Stories*. Cambridge University Press.
- 366 Gilman, S. E., Urban, M. C., Tewksbury, J., Gilchrist, G. W., & Holt, R. D. (2010). A framework for  
367 community interactions under climate change. *Trends in Ecology & Evolution*, *25*(6), 325–  
368 331.
- 369 Grevstad, F. S., Wepprich, T., Barker, B., Coop, L. B., Shaw, R., & Bouchier, R. S. (2022). Combining  
370 photoperiod and thermal responses to predict phenological mismatch for introduced  
371 insects. *Ecological Applications*, *32*(3), e2557. <https://doi.org/10.1002/eap.2557>

- 372 Harris, D. J., Taylor, S. D., & White, E. P. (2018). Forecasting biodiversity in breeding birds using best  
373 practices. *PeerJ*, 6, e4278. <https://doi.org/10.7717/peerj.4278>
- 374 Hartman, M. D., Parton, W. J., Derner, J. D., Schulte, D. K., Smith, W. K., Peck, D. E., Day, K. A., Del  
375 Grosso, S. J., Lutz, S., Fuchs, B. A., Chen, M., & Gao, W. (2020). Seasonal grassland  
376 productivity forecast for the U.S. Great Plains using Grass-Cast. *Ecosphere*, 11(11), e03280.  
377 <https://doi.org/10.1002/ecs2.3280>
- 378 Iler, A. M., Compagnoni, A., Inouye, D. W., Williams, J. L., CaraDonna, P. J., Anderson, A., & Miller, T.  
379 E. X. (2019). Reproductive losses due to climate change-induced earlier flowering are not the  
380 primary threat to plant population viability in a perennial herb. *Journal of Ecology*, 107(4),  
381 1931–1943. <https://doi.org/10.1111/1365-2745.13146>
- 382 Jones, W. G., Hill, K. D., & Allen, J. M. (1995). *Wollemia nobilis*, a new living Australian genus and  
383 species in the Araucariaceae. *Telopea - Journal of Plant Systematics*, 6, 173–176.  
384 <https://doi.org/10.7751/telopea19953014>
- 385 Karger, D. N., Conrad, O., Böhner, J., Kawohl, T., Kreft, H., Soria-Auza, R. W., Zimmermann, N. E.,  
386 Linder, H. P., & Kessler, M. (2017). Climatologies at high resolution for the earth's land  
387 surface areas. *Scientific Data*, 4(1), 1–20. <https://doi.org/10.1038/sdata.2017.122>
- 388 Karger, D. N., Conrad, O., Böhner, J., Kawohl, T., Kreft, H., Soria-Auza, R. W., Zimmermann, N. E.,  
389 Linder, H. P., & Kessler, M. (2018). *Data from: Climatologies at high resolution for the earth's*  
390 *land surface areas* (Version 1, p. 7266827510 bytes) [Data set]. Dryad.  
391 <https://doi.org/10.5061/DRYAD.KD1D4>
- 392 Kleinhesselink, A. R., & Adler, P. B. (2018). The response of big sagebrush (*Artemisia tridentata*) to  
393 interannual climate variation changes across its range. *Ecology*, 99(5), 1139–1149.  
394 <https://doi.org/10.1002/ecy.2191>
- 395 Knape, J., & de Valpine, P. (2011). Effects of weather and climate on the dynamics of animal  
396 population time series. *Proceedings of the Royal Society B: Biological Sciences*, 278(1708),  
397 985–992. <https://doi.org/10.1098/rspb.2010.1333>

- 398 Lewontin, R. C., & Cohen, D. (1969). On population growth in a randomly varying environment.  
399 *Proceedings of the National Academy of Sciences*, 62(4), 1056–1060.
- 400 Lindell, T., Ehrlén, J., & Dahlgren, J. P. (2022). Weather-driven demography and population dynamics  
401 of an endemic perennial plant during a 34-year period. *Journal of Ecology*, 110(3), 582–592.  
402 <https://doi.org/10.1111/1365-2745.13821>
- 403 Mace, G. M., Collar, N. J., Gaston, K. J., Hilton-Taylor, C., Akçakaya, H. R., Leader-Williams, N.,  
404 Milner-Gulland, E. J., & Stuart, S. N. (2008). Quantification of Extinction Risk: IUCN's System  
405 for Classifying Threatened Species. *Conservation Biology*, 22(6), 1424–1442.  
406 <https://doi.org/10.1111/j.1523-1739.2008.01044.x>
- 407 Merow, C., Latimer, A. M., Wilson, A. M., McMahon, S. M., Rebelo, A. G., & Silander, J. A. (2014). On  
408 using integral projection models to generate demographically driven predictions of species'  
409 distributions: Development and validation using sparse data. *Ecography*, 37(12), 1167–1183.  
410 <https://doi.org/10.1111/ecog.00839>
- 411 Morley, J. W., Batt, R. D., & Pinsky, M. L. (2017). Marine assemblages respond rapidly to winter  
412 climate variability. *Global Change Biology*, 23(7), 2590–2601.  
413 <https://doi.org/10.1111/gcb.13578>
- 414 Nicolè, F., Dahlgren, J. P., Vivat, A., Till-Bottraud, I., & Ehrlén, J. (2011). Interdependent effects of  
415 habitat quality and climate on population growth of an endangered plant. *Journal of*  
416 *Ecology*, 99(5), 1211–1218. <https://doi.org/10.1111/j.1365-2745.2011.01852.x>
- 417 Paniw, M., James, T. D., Archer, C. R., Römer, G., Levin, S., Compagnoni, A., Che-Castaldo, J., Bennett,  
418 J. M., Mooney, A., Childs, D. Z., Ozgul, A., Jones, O. R., Burns, J. H., Beckerman, A. P.,  
419 Patwary, A., Sanchez-Gassen, N., Knight, T. M., & Salguero-Gómez, R. (2021). The myriad of  
420 complex demographic responses of terrestrial mammals to climate change and gaps of  
421 knowledge: A global analysis. *Journal of Animal Ecology*, n/a(n/a).  
422 <https://doi.org/10.1111/1365-2656.13467>

- 423 Salguero-Gómez, R., Jones, O. R., Archer, C. R., Bein, C., de Buhr, H., Farack, C., Gottschalk, F.,  
424 Hartmann, A., Henning, A., Hoppe, G., Römer, G., Ruoff, T., Sommer, V., Wille, J., Voigt, J.,  
425 Zeh, S., Vieregg, D., Buckley, Y. M., Che-Castaldo, J., ... Vaupel, J. W. (2016). COMADRE: A  
426 global data base of animal demography. *Journal of Animal Ecology*, *85*(2), 371–384.  
427 <https://doi.org/10.1111/1365-2656.12482>
- 428 Salguero-Gómez, R., Jones, O. R., Archer, C. R., Buckley, Y. M., Che-Castaldo, J., Caswell, H., Hodgson,  
429 D., Scheuerlein, A., Conde, D. A., Brinks, E., de Buhr, H., Farack, C., Gottschalk, F., Hartmann,  
430 A., Henning, A., Hoppe, G., Römer, G., Runge, J., Ruoff, T., ... Vaupel, J. W. (2015). The  
431 COMPADRE Plant Matrix Database: An open online repository for plant demography. *Journal*  
432 *of Ecology*, *103*(1), 202–218. <https://doi.org/10.1111/1365-2745.12334>
- 433 Schurr, F. M., Pagel, J., Cabral, J. S., Groeneveld, J., Bykova, O., O’Hara, R. B., Hartig, F., Kissling, W.  
434 D., Linder, H. P., Midgley, G. F., Schröder, B., Singer, A., & Zimmermann, N. E. (2012). How to  
435 understand species’ niches and range dynamics: A demographic research agenda for  
436 biogeography. *Journal of Biogeography*, *39*(12), 2146–2162. [https://doi.org/10.1111/j.1365-](https://doi.org/10.1111/j.1365-2699.2012.02737.x)  
437 [2699.2012.02737.x](https://doi.org/10.1111/j.1365-2699.2012.02737.x)
- 438 Sexton, J. P., McIntyre, P. J., Angert, A. L., & Rice, K. J. (2009). Evolution and Ecology of Species Range  
439 Limits. *Annual Review of Ecology, Evolution, and Systematics*, *40*(1), 415–436.  
440 <https://doi.org/10.1146/annurev.ecolsys.110308.120317>
- 441 Sheth, S. N., & Angert, A. L. (2018). Demographic compensation does not rescue populations at a  
442 trailing range edge. *Proceedings of the National Academy of Sciences*, *115*(10), 2413–2418.  
443 <https://doi.org/10.1073/pnas.1715899115>
- 444 Sibly, R. M., & Hone, J. (2002). Population growth rate and its determinants: An overview.  
445 *Philosophical Transactions of the Royal Society of London. Series B: Biological Sciences*,  
446 *357*(1425), 1153–1170. <https://doi.org/10.1098/rstb.2002.1117>
- 447 Sletvold, N., Dahlgren, J. P., Øien, D.-I., Moen, A., & Ehrlén, J. (2013). Climate warming alters effects  
448 of management on population viability of threatened species: Results from a 30-year

449 experimental study on a rare orchid. *Global Change Biology*, 19(9), 2729–2738.  
450 <https://doi.org/10.1111/gcb.12167>

451 Suttle, K. B., Thomsen, M. A., & Power, M. E. (2007). Species Interactions Reverse Grassland  
452 Responses to Changing Climate. *Science*, 315(5812), 640–642.  
453 <https://doi.org/10.1126/science.1136401>

454 Teller, B. J., Adler, P. B., Edwards, C. B., Hooker, G., & Ellner, S. P. (2016). Linking demography with  
455 drivers: Climate and competition. *Methods in Ecology and Evolution*, 7(2), 171–183.  
456 <https://doi.org/10.1111/2041-210X.12486>

457 Tenhumberg, B., Crone, E. E., Ramula, S., & Tyre, A. J. (2018). Time-lagged effects of weather on  
458 plant demography: Drought and *Astragalus scaphoides*. *Ecology*, 99(4), 915–925.  
459 <https://doi.org/10.1002/ecy.2163>

460 Thorne, J. H., Viers, J. H., Price, J., & Stoms, D. M. (2009). Spatial Patterns of Endemic Plants in  
461 California. *Natural Areas Journal*, 29(4), 344–366. <https://doi.org/10.3375/043.029.0402>

462 Tye, M., Dahlgren, J. P., Øien, D.-I., Moen, A., & Sletvold, N. (2018). Demographic responses to  
463 climate variation depend on spatial- and life history-differentiation at multiple scales.  
464 *Biological Conservation*, 228, 62–69. <https://doi.org/10.1016/j.biocon.2018.10.005>

465 Urban, M. C., Bocedi, G., Hendry, A. P., Mihoub, J.-B., Peer, G., Singer, A., Bridle, J. R., Crozier, L. G.,  
466 De Meester, L., Godsoe, W., Gonzalez, A., Hellmann, J. J., Holt, R. D., Huth, A., Johst, K., Krug,  
467 C. B., Leadley, P. W., Palmer, S. C. F., Pantel, J. H., ... Travis, J. M. J. (2016). Improving the  
468 forecast for biodiversity under climate change. *Science*, 353(6304), aad8466–aad8466.  
469 <https://doi.org/10.1126/science.aad8466>

470 Vilellas, J., Ehrlén, J., Crone, E. E., Csergő, A. M., Garcia, M. B., Laine, A., Roach, D. A.,  
471 Salguero-Gómez, R., Wardle, G. M., Childs, D. Z., Elder, B. D., Finn, A., Munné-Bosch, S.,  
472 Bachelot, B., Bódis, J., Bucharova, A., Caruso, C. M., Catford, J. A., Coghill, M., ... Buckley, Y.  
473 M. (2021). Phenotypic plasticity masks range-wide genetic differentiation for vegetative but

- 474 not reproductive traits in a short-lived plant. *Ecology Letters*, 24(11), 2378–2393.
- 475 <https://doi.org/10.1111/ele.13858>
- 476 Zuur, A., Ieno, E. N., Walker, N., Saveliev, A. A., & Smith, G. M. (2009). *Mixed Effects Models and*
- 477 *Extensions in Ecology with R*. Springer Science & Business Media.



478 **FIGURE LEGENDS**

479

480 **Figure 1.** The correlation between temperature and precipitation anomalies decays slowly with  
481 distance. The left column shows how temperature (A) and precipitation (C) anomalies change with  
482 distance from a reference location located in the middle of the great plains. The right column shows  
483 heatmaps of correlations in temperature (B) and precipitation (D) anomalies between the reference  
484 location (red point) and the remaining points for which we sampled climatic data.

485

486 **Figure 2.** The lower temporal correlation between two climatic anomalies allows to sample a larger  
487 absolute range of anomalies. Bivariate plot representing the range of climate anomalies sampled (y-  
488 axis) at two hypothetical sites, as a function of years sampled (x-axis). The color of dots shows the  
489 correlation of climate anomalies at these two hypothetical sites. A correlation of one implies that  
490 the two sites experience identical climatic anomalies each year.

491

492 **Figure 3.** Spatial replication provides a statistical power similar, or higher, to temporal replication.  
493 Plot showing statistical power on the y-axis against spatial replication on the x-axis. Symbols show  
494 temporal replication which goes from three (triangles), five (circles), 20 (square), and 30 (cross). The  
495 color of symbols refers to the correlation among spatial replicates. This correlation is one for the  
496 simulations with a single spatial replicate. The dashed horizontal line highlights a statistical power of  
497 80%.

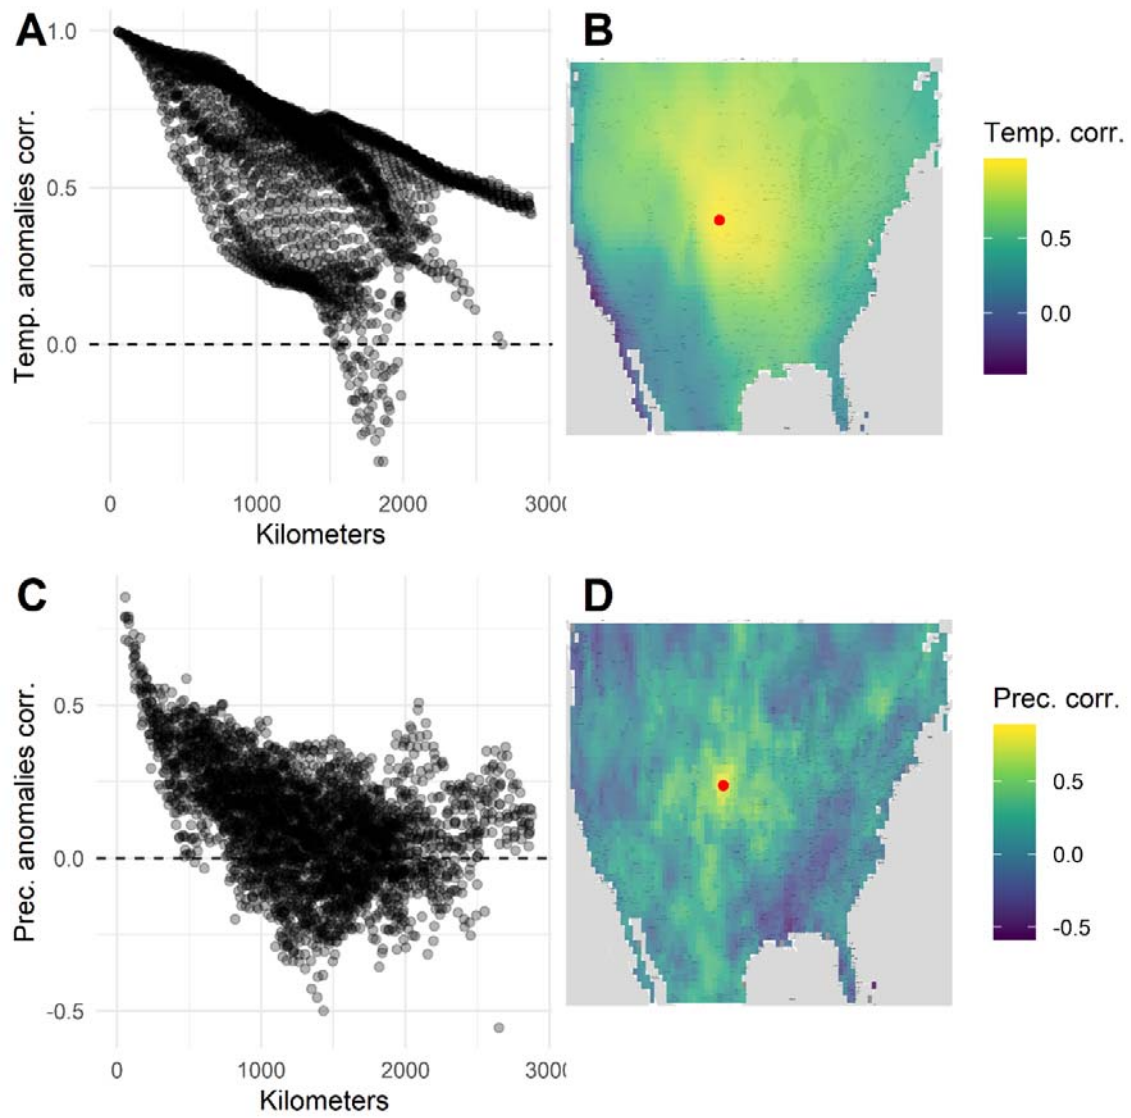

498

499 **Figure 1.**

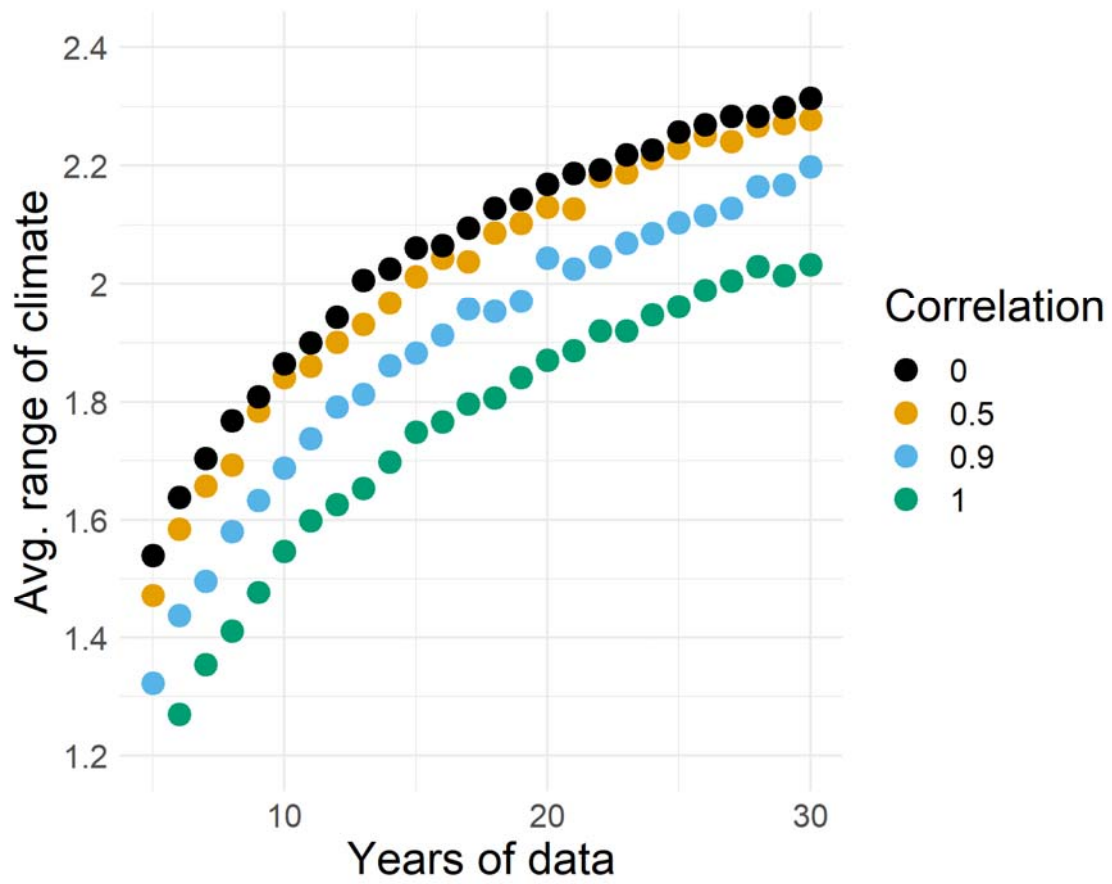

500

501 **Figure 2.**

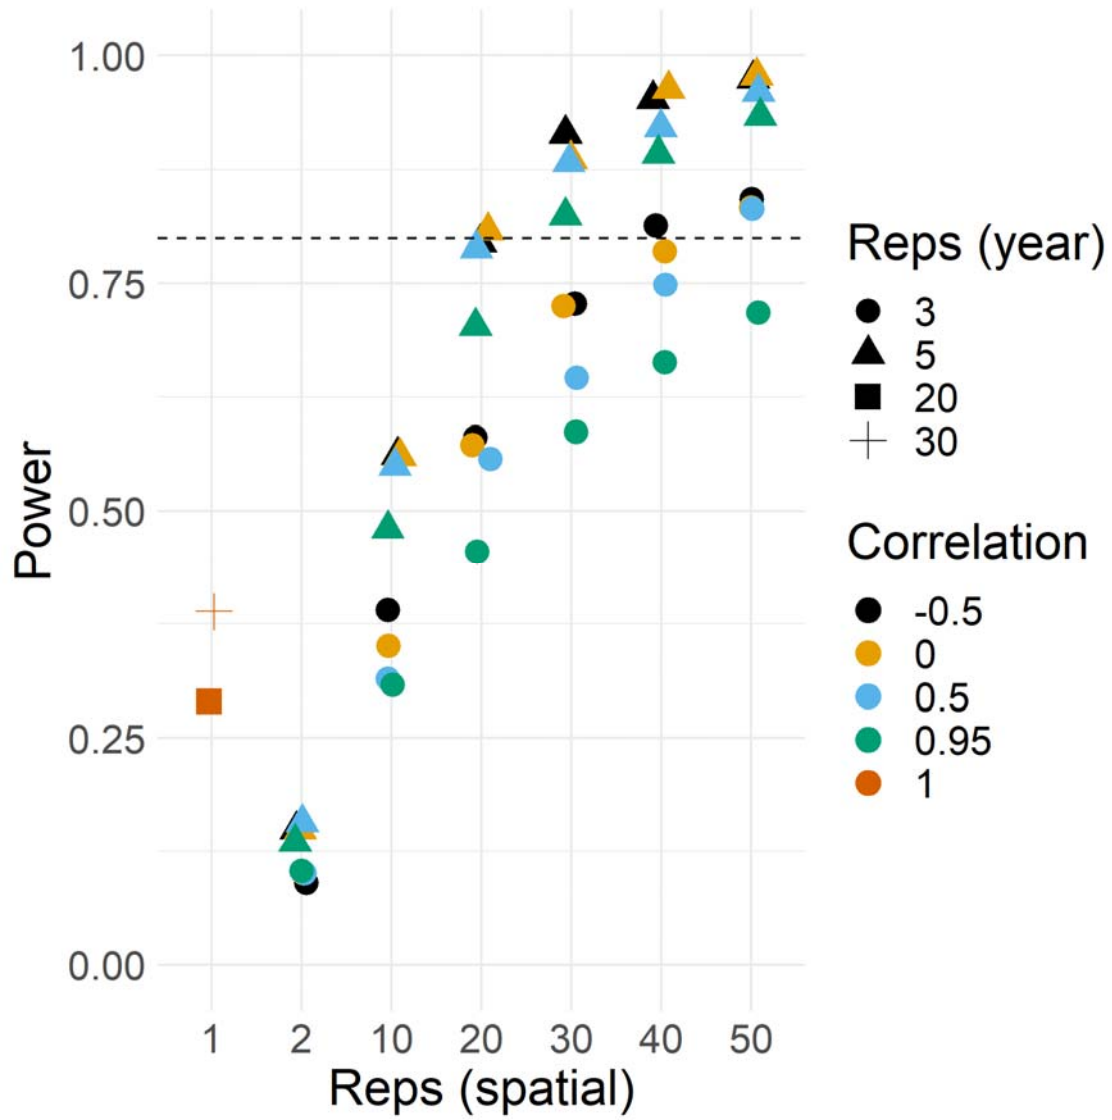

502

503 Figure 3.
